# Supplementary material for: Crystal structure of the meta-stable intermediate in the photomechanical, crystal-to-crystal reaction of 9-tert-butyl anthracene ester
Source: Royal Society of Chemistry journal article supplement (doi:10.1039/c6ce00742b), 2016-01-01
Supplement: c6ce00742b1.pdf [file c6ce00742b1.pdf]

## **Crystal Structure of the Meta-Stable Intermediate in the Photomechanical, Crystal-to-Crystal Reaction of 9-Tertbutyl Anthracene Ester**

Chen Yang<sup>(1)</sup>, Lingyan Zhu<sup>(1)</sup>, Ryan A. Kudla<sup>(1)</sup>, Joshua D. Hartman<sup>(1)</sup>, Rabih O. Al-Kaysi<sup>(2)</sup>,  
Stephen Monaco<sup>(3)</sup>, Bohdan Schatschneider<sup>(3,4)</sup>, Alvicler Magalhaes<sup>(1)</sup>, Gregory J.O. Beran<sup>(1)</sup>,  
Christopher J. Bardeen<sup>(1)\*</sup>, and Leonard J. Mueller<sup>(1)\*</sup>

<sup>(1)</sup>Department of Chemistry  
University of California, Riverside  
Riverside, CA 92521

<sup>(2)</sup>College of Science and Health Professions-3124  
King Saud bin Abdulaziz University for Health Sciences  
& King Abdullah International Medical Research Center  
Ministry of National Guard-Health Affairs  
Riyadh 11426 (Kingdom of Saudi Arabia)

<sup>(3)</sup>Department of Chemistry  
The Pennsylvania State University, Fayette  
The Eberly Campus  
Lemont Furnace, PA 15456

<sup>(4)</sup>Current Address: Department of Chemistry and Biochemistry  
Cal Poly Pomona  
3801 West Temple Avenue  
Pomona, California 91768

[\\*christopher.bardeen@ucr.edu](mailto:christopher.bardeen@ucr.edu)  
[\\*leonard.mueller@ucr.edu](mailto:leonard.mueller@ucr.edu)

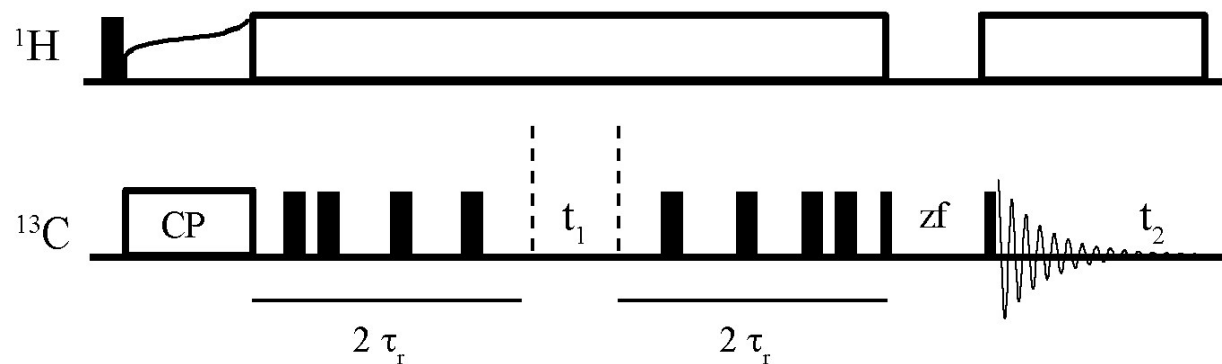

**Figure S1.** The modified TOSS-deTOSS pulse sequence<sup>1</sup> includes cog-wheel phase cycling<sup>2</sup> (COG16(0,1,0,1,0,1,0,1,0;0)) of the 8  $\pi$  pulses on carbon comprising the TOSS and deTOSS periods and the addition of the final z-filter (zf).

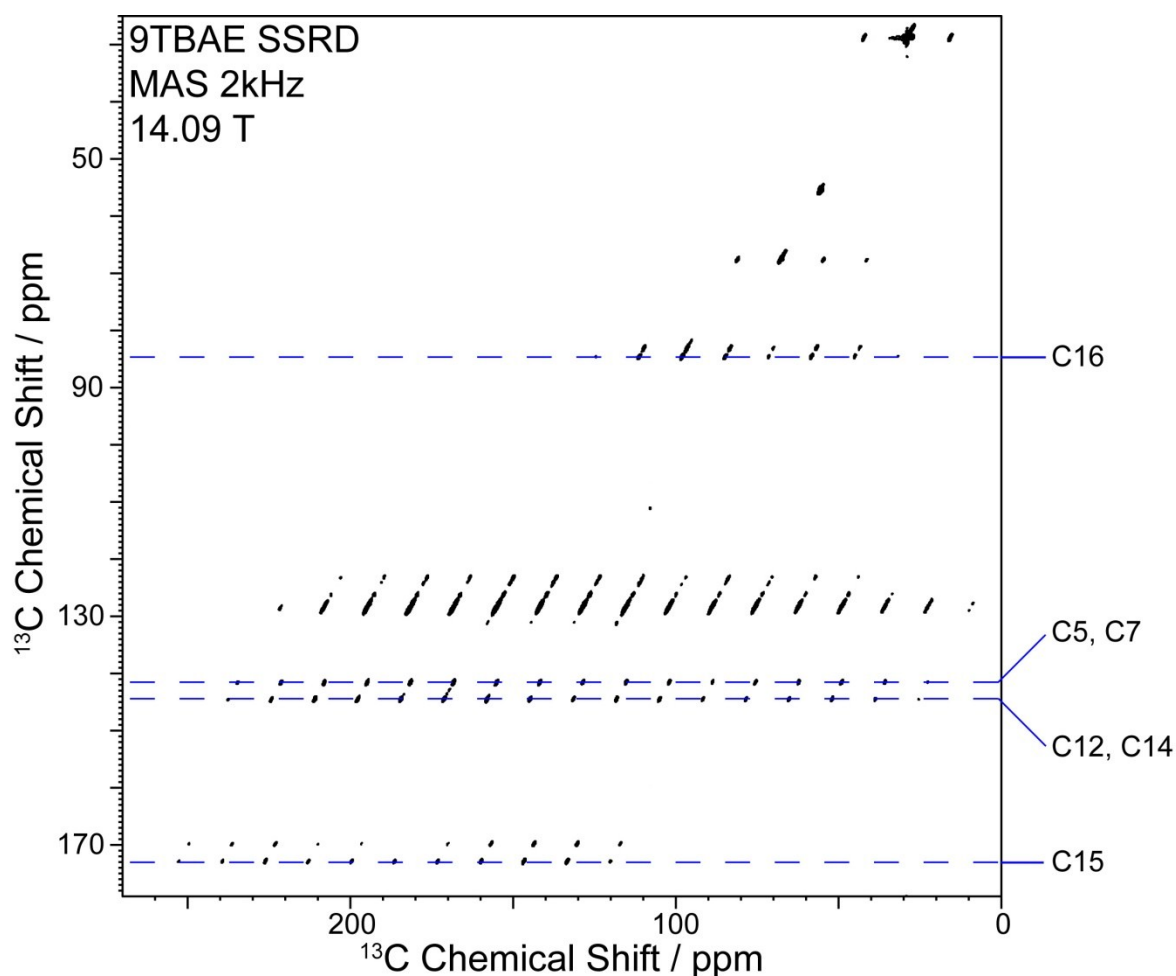

**Figure S2.** The TOSS-deTOSS spectrum of the SSRD at 14.09 T and 2 kHz MAS. The sideband-free isotropic chemical shift appears on vertical (f1) axis, while chemical shift anisotropies are encoded along the horizontal (f2) axis. Four traces were selected for fitting and are shown in Figure S3. 2D data were acquired as 2048 complex-valued points in t2 (spectral width 50 kHz, total acquisition time 41.02 ms) and 512 complex points in t1 (spectral width 25 kHz, total acquisition time 20.48 ms); 16 transients were co-added at each t1 point with a recycle delay of 3 s, for a total experiment time of 7 hours.

a) C15

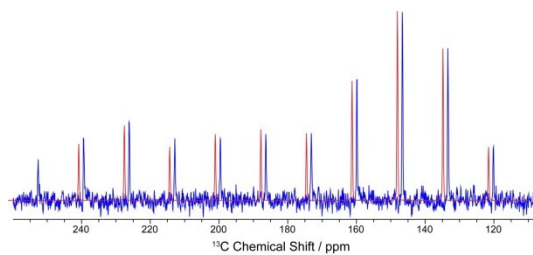

b) C5, C7

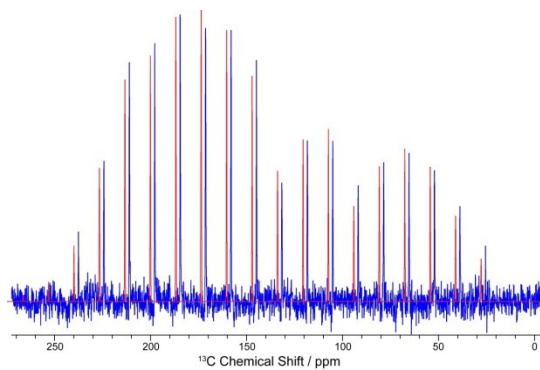

c) C12, C14

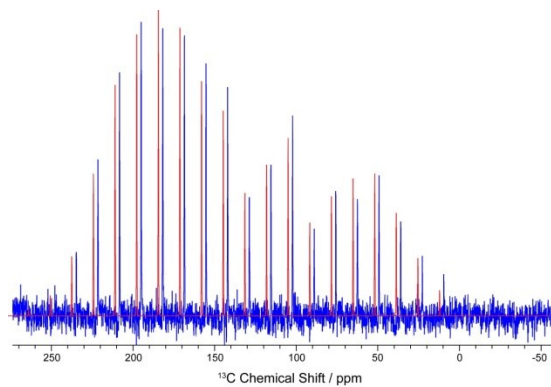

d) C15

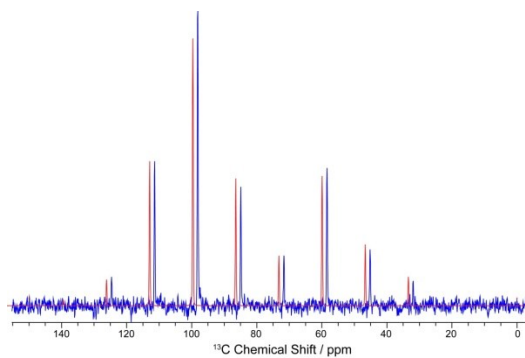

**Figure S3.** 1D traces (blue) from the SSRD TOSS-deTOSS spectrum used for extracting the CSA tensors via Herzfeld-Berger analysis (red) for the indicated carbon sites.

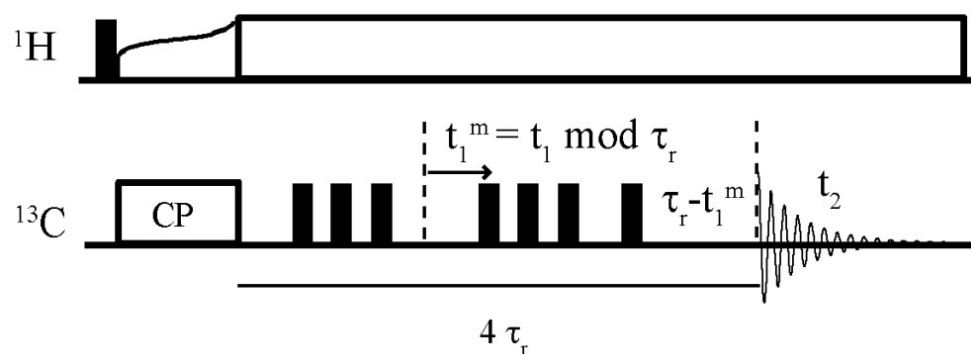

**Figure S4.** The xCSA<sup>3</sup> pulse sequence modified for extended  $t_1$  acquisition. This sequence makes use of modula acquisition to experimentally extend the  $t_1$  signal (which is periodic over one rotor period) and allow for full resolution of the sidebands and better definition of the baseline in the spectra shown in Figures S5/S6.

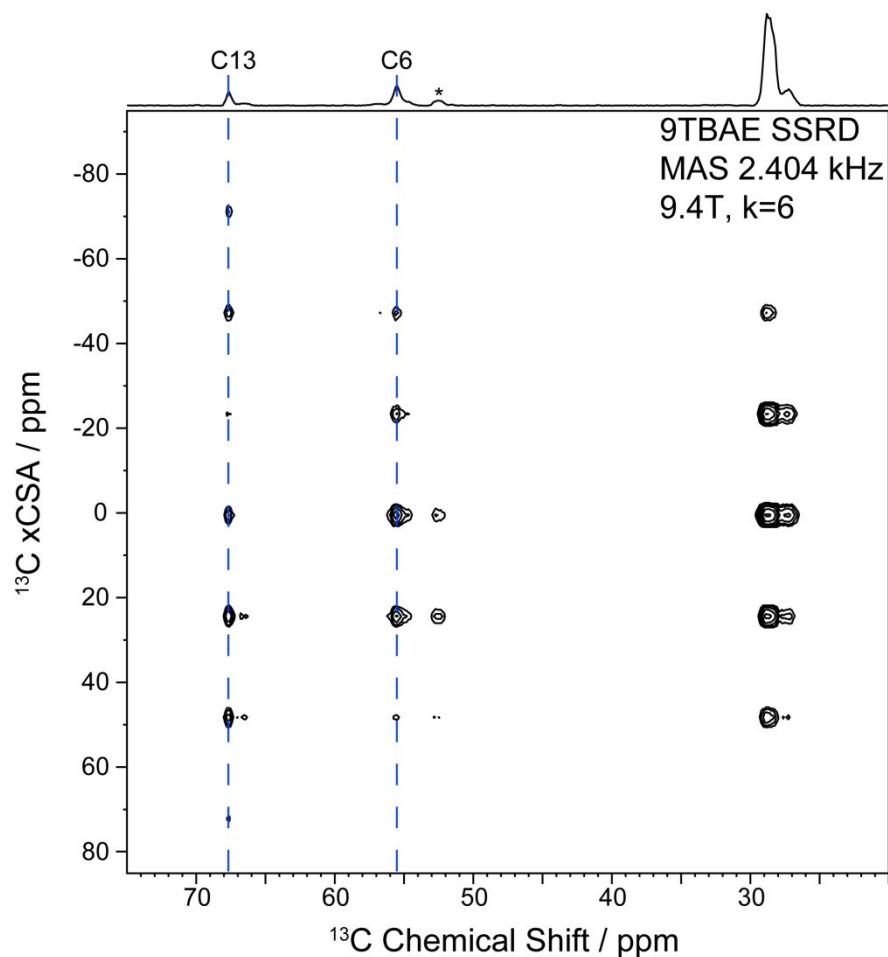

**Figure S5.** The xCSA spectrum of the SSRD at 9.4 T and 2.404 kHz MAS. The sideband-free isotropic chemical shift is on horizontal (f2) axis, while chemical shift anisotropies are encoded along the vertical (f1). Two traces were selected for fitting and are shown in Figure S6. 2D data were acquired as 2048 complex-valued points in t2 (spectral width 50 kHz, total acquisition time 40.96 ms) and 128 real-valued points in t1 (26  $\mu$ s dwell, total acquisition time 3.328 ms); 64 transients were co-added at each t1 point with a recycle delay of 4 s, for a total experiment time of 15.5 hours.

C6

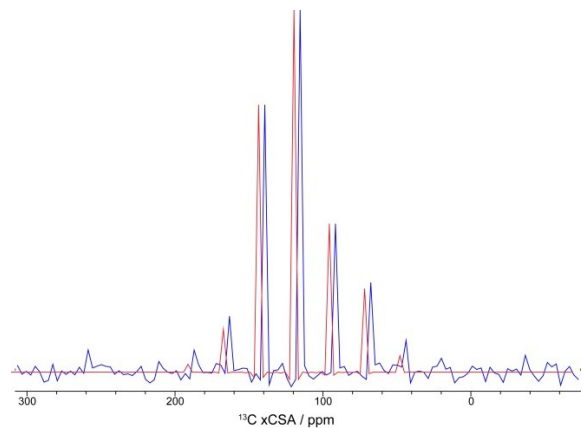

C13

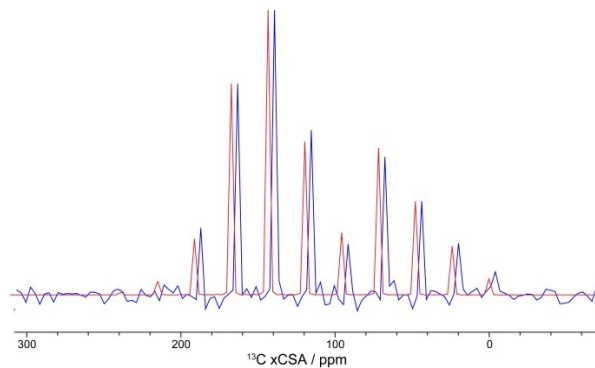

**Figure S6.** 1D traces (blue) from the SSRD xCSA spectrum used for extracting the CSA tensors via Herzfeld-Berger analysis (red) for the indicated carbon sites.

## References

1. A. C. Kolbert and R. G. Griffin, *Chemical Physics Letters*, 1990, **166**, 87-91.
2. N. Ivchenko, C. E. Hughes and M. H. Levitt, *Journal of Magnetic Resonance*, 2003, **164**, 286-293.
3. I. Hung and Z. H. Gan, *J. Magn. Reson.*, 2011, **213**, 196-199.
