# Supplementary material for: Crystal structure of the meta-stable intermediate in the photomechanical, crystal-to-crystal reaction of 9-tert-butyl anthracene ester
Source: Royal Society of Chemistry journal article supplement (doi:10.1039/c6ce00742b), 2016-01-01
Supplement: c6ce00742b2.csv [file c6ce00742b2.csv]

Space Group	Atom Number	Shielding isotropic	Shift isotropic	Shielding PAS 11	Shielding PAS 22	Shielding PAS 33	Shift PAS 11	Shift PAS 22	Shift PAS 33	Shielding XX	XY	XZ	YX	YY	YZ	ZX	ZY	ZZ
ABA2	1	52.6399	128.6662	-60.0838	4.62	161.7052	237.7151	175.1206	23.1564
Carbons	2	53.5431	127.7924	-50.3502	30.4282	180.5514	228.2988	150.1538	4.9245
	3	55.1435	126.2442	-50.9352	39.0164	177.3493	228.8647	141.8455	8.0223
	4	54.8406	126.5372	-46.3887	42.408	168.5027	224.4665	138.5645	16.5805
	5	40.9616	139.9637	-54.0304	4.5188	172.3965	231.8591	175.2185	12.8136	52.3003	-73.5904	73.653	-70.5145	84.2136	-44.4007	57.3917	-41.3642	-13.629
	6	127.7859	55.97	120.9273	123.4279	139.0025	62.605	60.1859	45.119	124.4869	-17.4647	-0.6428	3.2898	135.5322	-0.011	-0.534	0.217	123.3385
	7	39.298	141.5731	-57.5342	3.5481	171.88	235.2486	176.1575	13.3132	45.4866	-74.1636	-77.6314	-68.6931	83.9372	47.2067	-59.8898	41.7657	-11.5298
	8	52.4623	128.838	-46.7059	37.3563	166.7364	224.7733	143.4515	18.2892
	9	55.7369	125.6701	-50.8049	41.1382	176.8774	228.7387	139.7929	8.4788
	10	53.7497	127.5925	-50.1923	30.0909	181.3505	228.146	150.4801	4.1515
	11	52.6018	128.703	-46.4407	32.8167	171.4295	224.5168	147.8431	13.7491
	12	35.1722	145.5644	-61.2737	3.9578	162.8325	238.8662	175.7612	22.0658	64.4413	-74.5084	-29.8613	-68.3739	59.7031	78.8	-33.3194	62.7404	-18.6278
	13	113.8658	69.4362	100.8616	105.3046	135.4313	82.0165	77.7183	48.5737	135.3446	5.8659	0.8907	-9.042	105.3102	0.3479	-0.1872	0.7848	100.9427
	14	35.4138	145.3307	-60.0838	4.62	161.7052	237.7151	175.1206	23.1564	68.5982	-74.1765	27.6982	-71.1009	58.151	-76.1814	31.3328	-57.8115	-20.5079
	15	3.3501	176.3491	-90.835	30.9683	69.9169	267.4638	149.6312	111.9524	3.115	-34.4997	-0.9602	-67.8936	-62.2684	-8.1701	-2.8753	-10.4134	69.2036
	16	95.483	87.2197	61.4788	70.0264	154.944	120.1154	111.8465	29.6972	122.0794	45.5526	-2.7302	43.4138	94.1654	-2.5515	-3.3932	-3.0263	70.2043
	17	156.6302	28.066	140.0508	148.3287	181.511	44.1048	36.0968	3.9963
	18	158.5595	26.1995	139.6081	151.4589	184.6115	44.5332	33.0686	0.9968
	19	153.3082	31.2796	134.4556	145.1819	180.2873	49.5177	39.1411	5.1801
	1'	52.4185	128.8803	-45.1001	30.4445	171.9112	223.2198	150.138	13.2831
	2'	54.1403	127.2147	-50.0254	31.7083	180.7379	227.9846	148.9154	4.7441
	3'	54.6151	126.7553	-50.8268	38.4459	176.2263	228.7599	142.3974	9.1087
	4'	51.5367	129.7334	-46.4234	37.4445	163.589	224.5	143.3662	21.334
	5'	39.9524	140.9401	-58.4221	5.7583	172.521	236.1076	174.0195	12.6932	53.6288	-73.0976	-71.9781	-71.8525	83.7159	42.7138	-63.3387	39.2494	-17.4876
	6'	127.0296	56.7016	121.162	123.6049	136.3218	62.3778	60.0146	47.7123	124.0968	-15.3735	1.4339	3.6835	133.4253	-0.7862	0.4153	-0.6036	123.5667
	7'	40.245	140.657	-56.6268	3.8327	173.5291	234.3707	175.8822	11.718	51.6415	-73.2048	73.4292	-74.8933	82.9719	-42.9739	62.1891	-39.8167	-13.8784
	8'	52.9272	128.3883	-47.0001	40.4968	165.2848	225.0579	140.4134	19.6935
	9'	55.4551	125.9427	-50.9435	40.5559	176.753	228.8728	140.3562	8.5991
	10'	53.1218	128.2	-52.0785	29.405	182.0389	229.9708	151.1436	3.4856
	11'	53.8376	127.5075	-46.4905	36.1409	171.8623	224.5649	144.6273	13.3304
	12'	35.108	145.6266	-61.4879	4.6867	162.1251	239.0734	175.0561	22.7501	64.9052	-72.6753	30.9559	-68.8418	57.8562	-79.9015	32.4995	-62.9016	-17.4375
	13'	113.6548	69.6404	101.0134	104.5777	135.3732	81.8696	78.4216	48.6299	135.3263	6.6247	-0.4096	-9.023	104.5464	-0.8317	0.1698	-0.2021	101.0916
	14'	35.2267	145.5117	-62.3209	5.0602	162.9409	239.8792	174.6948	21.961	69.2662	-73.3037	-30.0989	-71.7723	57.2733	78.5975	-30.9234	59.6826	-20.8593
	15'	2.9494	176.7367	-90.7596	30.0836	69.5242	267.3908	150.4871	112.3323	2.4561	-34.2354	1.4687	-67.2304	-62.5337	7.6586	2.9789	9.7263	68.9259
	16'	95.012	87.6754	60.4894	69.787	154.7595	121.0725	112.078	29.8756	120.9339	45.5846	2.599	44.567	94.1341	2.685	3.5002	2.9192	69.968
	17'	156.8847	27.8197	140.5109	148.2871	181.8562	43.6598	36.1371	3.6623
	18'	158.6218	26.1393	140.7451	150.9663	184.154	43.4332	33.5452	1.4394
	19'	153.1531	31.4297	134.3886	144.6621	180.4087	49.5824	39.6439	5.0626
Hydrogen	1	24.0422	6.655
	2	24.044	6.6534
	3	24.1785	6.5305
	4	24.2045	6.5068
	6	25.1714	5.6234
	8	23.915	6.7713
	9	24.0652	6.634
	10	23.5013	7.1492
	11	24.062	6.637
	17	30.8278	0.4557
	18	30.3982	0.8482
	19	28.824	2.2864
	20	29.0059	2.1202
	21	30.5024	0.753
	22	31.0792	0.226
	23	29.9458	1.2615
	24	30.1277	1.0954
	25	31.5259	-0.182
	1'	24.0637	6.6354
	2'	23.9042	6.7812
	3'	24.1172	6.5866
	4'	23.6404	7.0222
	6'	25.4158	5.4002
	8'	23.7221	6.9475
	9'	24.0497	6.6482
	10'	23.4963	7.1538
	11'	24.1521	6.5546
	17'	30.8185	0.4642
	18'	30.4185	0.8297
	19'	28.816	2.2937
	20'	29.0145	2.1123
	21'	30.5062	0.7495
	22'	31.0955	0.2112
	23'	29.9115	1.2929
	24'	30.1103	1.1112
	25'	31.4632	-0.1248
A2122	1	52.4044	128.894	-59.5876	5.889	165.4667	237.235	173.893	19.5175
Carbons	2	52.4955	128.8059	-52.4286	28.113	181.802	230.3095	152.3935	3.7147
	3	55.4729	125.9255	-50.8075	39.6843	177.5419	228.7411	141.1994	7.836
	4	55.5751	125.8266	-45.2663	44.2602	167.7314	223.3806	136.7727	17.3267
	5	40.8199	140.1009	-56.7458	4.9291	174.2763	234.4859	174.8216	10.9951	53.8881	75.8821	-73.0529	72.9877	85.9218	-41.699	-58.7084	-39.14	-17.3503
	6	128.4695	55.3086	120.1082	124.8875	140.4129	63.3974	58.7739	43.7546	124.2287	18.0837	2.1415	-2.9429	136.8717	0.2164	0.6801	-1.5475	124.3081
	7	40.5243	140.3868	-55.9394	5.8621	171.6502	233.7057	173.919	13.5356	49.143	72.9148	72.9364	71.5773	83.7444	40.343	63.4025	41.3647	-11.3144
	8	54.1833	127.173	-44.2378	40.1172	166.6706	222.3857	140.7806	18.3528
	9	55.8641	125.5471	-51.0984	41.9605	176.7301	229.0226	138.9974	8.6213
	10	53.8251	127.5196	-51.712	32.5606	180.6267	229.6162	148.0909	4.8517
	11	55.2653	126.1263	-43.2986	38.7455	170.3491	221.4771	142.1076	14.7943
	12	35.6217	145.1295	-60.7056	4.4366	163.1342	238.3166	175.2981	21.774	65.955	73.4064	31.814	70.0486	59.4207	77.7695	31.0751	62.4226	-18.5105
	13	114.5329	68.7908	101.3921	106.4016	135.8051	81.5033	76.6571	48.2122	135.7564	-6.3942	-1.8268	8.4795	105.7389	1.944	0.4102	1.4811	102.1035
	14	37.256	143.5485	-59.5876	5.889	165.4667	237.235	173.893	19.5175	74.0421	74.2441	-30.4451	74.1447	57.6562	-75.9924	-30.1772	-57.5273	-19.9302
	15	1.4205	178.2158	-93.4506	28.1683	69.5439	269.9941	152.34	112.3133	1.0125	34.3813	2.6384	66.8206	-63.8682	-15.761	6.1011	-19.4189	67.1173
	16	95.8105	86.903	61.7721	70.6439	155.0154	119.8317	111.249	29.6281	120.5324	-46.4552	0.5506	-43.3896	96.3932	-1.9928	0.7534	-2.1182	70.5058
	17	157.0111	27.6975	140.3944	148.1428	182.496	43.7724	36.2766	3.0434
	18	158.8465	25.9219	139.4423	151.5881	185.5092	44.6935	32.9437	0.1284
	19	153.2336	31.3518	134.4276	144.2417	181.0316	49.5447	40.0505	4.4601
	1'	50.6536	130.5877	-48.7164	27.0211	173.6562	226.7183	153.4498	11.595
	2'	53.4955	127.8385	-50.0632	27.6713	182.8783	228.0211	152.8208	2.6736
	3'	54.8408	126.537	-51.6983	39.2195	177.0012	229.6029	141.649	8.3591
	4'	51.7407	129.536	-45.6514	36.1601	164.7135	223.7532	144.6087	20.2461
	5'	38.8574	141.9993	-59.7727	3.9912	172.3538	237.4141	175.7289	12.8549	53.8881	75.8819	73.0529	73.9709	83.7168	39.9776	59.1922	37.0605	-21.0326
	6'	127.4023	56.341	120.5803	122.1347	139.4921	62.9406	61.4369	44.6454	124.2287	18.0837	-2.1417	-3.6611	135.5957	-0.9779	-0.9709	-3.3116	122.3826
	7'	38.8217	142.0339	-56.1494	3.3234	169.2912	233.9089	176.3749	15.8177	49.1431	72.9148	-72.9363	69.8476	82.0203	-45.5167	-59.0766	-38.8711	-14.6982
	8'	53.1942	128.1299	-45.289	37.527	167.3447	223.4026	143.2864	17.7007
	9'	55.7819	125.6266	-50.3051	41.316	176.3349	228.2552	139.6209	9.0036
	10'	55.0072	126.376	-50.059	32.8553	182.2255	228.0171	147.8058	3.3051
	11'	53.4551	127.8775	-44.7082	32.9757	172.0979	222.8407	147.6893	13.1025
	12'	35.5091	145.2385	-60.7021	4.355	162.8743	238.3132	175.377	22.0254	65.955	73.4062	-31.8141	67.9226	58.8098	-79.3851	-34.0462	-61.5742	-18.2376
	13'	114.3814	68.9374	100.9792	106.3006	135.8645	81.9027	76.7548	48.1547	135.7565	-6.3942	1.8269	9.7837	106.3857	0.0775	-0.5861	-0.5191	101.0021
	14'	35.3694	145.3736	-65.5949	6.4229	165.2801	243.0465	173.3765	19.698	74.0421	74.2441	30.4452	74.5308	59.135	81.3843	26.8584	54.5622	-27.0689
	15'	2.427	177.2421	-92.0198	28.919	70.3818	268.61	151.6138	111.5026	1.0127	34.3812	-2.6384	67.0548	-62.1048	15.1645	-7.7048	17.2861	68.3731
	16'	94.9939	87.6929	59.8783	69.5727	155.5306	121.6637	112.2854	29.1297	120.5322	-46.4553	-0.5505	-45.5867	94.8734	1.3762	-1.9887	2.2739	69.576
	17'	156.6857	28.0123	139.2535	148.2803	182.5233	44.8762	36.1436	3.017
	18'	160.0865	24.7223	141.9243	152.158	186.1772	42.2924	32.3924	-0.5179
	19'	153.3978	31.193	134.1095	144.684	181.3998	49.8524	39.6227	4.1038
Hydrogen	1	24.1015	6.6009
	2	23.6014	7.0578
	3	24.1943	6.5161
	4	24.3042	6.4157
	6	25.1537	5.6395
	8	23.8919	6.7923
	9	24.2615	6.4547
	10	23.9039	6.7814
	11	24.3312	6.391
	17	30.7219	0.5525
	18	30.3586	0.8844
	19	28.7411	2.3621
	20	29.1161	2.0196
	21	30.5935	0.6698
	22	31.2846	0.0384
	23	30.0107	1.2022
	24	30.1777	1.0497
	25	31.4441	-0.1074
	1'	24.2934	6.4256
	2'	23.5616	7.0941
	3'	24.0268	6.6691
	4'	23.8168	6.861
	6'	25.5635	5.2652
	8'	24.0964	6.6055
	9'	24.0674	6.6321
	10'	23.729	6.9412
	11'	24.0205	6.6749
	17'	30.6988	0.5735
	18'	30.2274	1.0042
	19'	28.7662	2.3392
	20'	29.1573	1.9819
	21'	30.834	0.4501
	22'	31.3651	-0.0352
	23'	30.0705	1.1476
	24'	30.2151	1.0155
	25'	31.432	-0.0962
PBCA	1	52.4214	128.8776	-61.1829	4.4281	162.571	238.7783	175.3063	22.3188
Carbons	2	53.8985	127.4486	-51.0731	32.3783	180.3905	228.9981	148.2673	5.0803
	3	55.5182	125.8817	-50.4814	40.3155	176.7206	228.4257	140.5887	8.6305
	4	53.6339	127.7045	-46.6502	40.8286	166.7234	224.7194	140.0924	18.3017
	5	40.8305	140.0906	-54.938	5.2836	172.1458	232.737	174.4786	13.0562	53.7797	72.9004	71.4864	59.8833	-14.3819	41.0284	71.5266	44.2301	83.0936
	6	127.7153	56.0382	120.8617	123.885	138.3993	62.6684	59.7437	45.7026	124.4688	1.0567	17.0636	0.4775	123.7053	-0.4926	-3.2561	0.3278	134.9718
	7	40.4671	140.4422	-56.423	6.0183	171.8058	234.1736	173.7679	13.385	49.4865	-74.0498	71.8465	-62.1005	-12.6048	-40.3278	69.6321	-45.8015	84.5195
	8	52.8841	128.43	-46.6187	39.6882	165.5828	224.689	141.1957	19.4052
	9	54.5903	126.7793	-51.5599	38.6956	176.6353	229.469	142.1559	8.713
	10	52.4909	128.8103	-51.035	27.0502	181.4575	228.9613	153.4217	4.048
	11	53.4266	127.9051	-45.4022	34.2007	171.4813	223.5121	146.5042	13.699
	12	35.494	145.2531	-60.4124	4.2132	162.6812	238.033	175.5142	22.2122	65.7708	-32.5136	72.5317	-33.5437	-18.2672	-61.7661	68.5464	-78.6714	58.9784
	13	113.9761	69.3296	100.7516	105.6179	135.5586	82.1229	77.4152	48.4506	135.5292	-0.1134	-6.8249	-0.6879	100.7744	-0.5182	8.5418	-0.095	105.6246
	14	35.2721	145.4678	-61.1829	4.4281	162.571	238.7783	175.3063	22.3188	69.3983	30.3107	73.9753	30.8785	-20.0268	59.2638	71.6823	77.1837	56.4447
	15	3.296	176.4015	-90.3395	30.3636	69.8638	266.9844	150.2163	112.0038	2.5364	-0.3098	34.1482	-1.8413	69.4697	7.8592	67.6313	5.6407	-62.1182
	16	95.4258	87.275	61.2958	70.4647	154.517	120.2924	111.4225	30.1102	121.3268	-2.8218	-45.529	-3.6335	70.6683	2.9311	-43.4572	2.4494	94.2824
	17	153.2748	31.3119	134.7227	144.9936	180.1082	49.2593	39.3232	5.3533
	18	157.2139	27.5012	140.3765	149.0441	182.2211	43.7897	35.4047	3.3093
	19	158.1569	26.589	139.5074	150.7011	184.2622	44.6305	33.8017	1.3348
	1'	51.9472	129.3363	-46.9917	31.1077	171.7255	225.0497	149.4964	13.4627
	2'	53.7594	127.5832	-50.4221	31.2219	180.4783	228.3683	149.386	4.9953
	3'	55.5043	125.8951	-50.8091	40.6319	176.6901	228.7427	140.2827	8.66
	4'	53.1063	128.215	-44.8019	38.1494	165.9713	222.9313	142.6842	19.0293
	5'	38.5775	142.2701	-58.9671	2.8535	171.8462	236.6348	176.8295	13.346	52.2365	75.3267	74.9339	62.2094	-16.127	39.1493	73.0813	41.7886	79.6231
	6'	127.7059	56.0473	120.9525	123.4952	138.6699	62.5806	60.1207	45.4407	124.2165	0.7109	16.6002	0.5319	123.4624	0.1537	-3.0022	0.6749	135.4387
	7'	39.4538	141.4224	-55.2949	2.0583	171.5981	233.0823	177.5988	13.586	47.4232	-76.1045	74.6056	-58.6341	-10.8045	-42.0459	71.7081	-43.733	81.7428
	8'	53.577	127.7596	-44.7793	39.0503	166.46	222.9095	141.8127	18.5566
	9'	55.0537	126.331	-51.1031	39.5852	176.6791	229.0272	141.2953	8.6706
	10'	52.6522	128.6543	-50.9955	27.4965	181.4555	228.923	152.9899	4.05
	11'	52.8441	128.4686	-46.2303	33.4455	171.3173	224.3132	147.2348	13.8577
	12'	35.1477	145.5881	-61.3732	4.217	162.5993	238.9624	175.5105	22.2914	65.6312	-31.4846	73.1071	-33.428	-18.5865	-61.7158	68.6851	-79.7081	58.3984
	13'	113.4166	69.8708	100.851	104.419	134.9798	82.0267	78.5751	49.0105	134.878	0.0479	-5.6908	-0.3735	100.8887	-0.4835	9.198	-0.2565	104.4831
	14'	35.2969	145.4438	-61.9718	5.0996	162.7628	239.5415	174.6567	22.1333	69.6268	29.4084	73.768	31.4291	-20.3884	59.6755	71.453	78.0925	56.6522
	15'	3.1678	176.5255	-90.9776	30.5664	69.9146	267.6018	150.02	111.9546	2.7109	-0.464	34.7736	-2.1349	69.54	7.6304	67.4552	5.796	-62.7475
	16'	95.6791	87.03	61.2154	70.5271	155.2948	120.3703	111.3621	29.3578	121.9748	-2.8001	-45.5946	-3.405	70.714	3.0891	-44.1099	2.4279	94.3485
	17'	153.5887	31.0083	134.6975	145.9125	180.1561	49.2836	38.4342	5.307
	18'	157.2646	27.4522	140.5317	149.1614	182.1008	43.6396	35.2913	3.4257
	19'	158.4118	26.3425	139.6316	151.3787	184.225	44.5104	33.1463	1.3707
Hydrogen	1	24.0343	6.6622
	2	23.768	6.9056
	3	24.0851	6.6159
	4	24.0091	6.6853
	6	25.2349	5.5654
	8	23.919	6.7676
	9	24.1578	6.5495
	10	23.6075	7.0522
	11	24.1208	6.5832
	17	31.5098	-0.1674
	18	29.9587	1.2497
	19	30.0023	1.2099
	20	30.3655	0.8781
	21	28.7802	2.3264
	22	30.8475	0.4377
	23	28.9808	2.1431
	24	30.5235	0.7338
	25	31.0774	0.2277
	1'	24.1163	6.5873
	2'	23.7864	6.8887
	3'	24.0869	6.6142
	4'	23.8079	6.8691
	6'	25.3771	5.4355
	8'	23.9184	6.7682
	9'	24.129	6.5758
	10'	23.68	6.986
	11'	24.1879	6.5219
	17'	31.5	-0.1584
	18'	29.9621	1.2466
	19'	30.016	1.1974
	20'	30.383	0.8621
	21'	28.7945	2.3134
	22'	30.8517	0.4339
	23'	29.0159	2.1111
	24'	30.5259	0.7315
	25'	31.0462	0.2562
P21CN	1	52.6614	128.6454	-46.2875	32.989	171.2827	224.3685	147.6764	13.8911
Carbons	2	53.0602	128.2595	-50.0715	29.2924	179.9598	228.0291	151.2526	5.4969
	3	55.4898	125.9092	-51.2099	40.4244	177.2549	229.1305	140.4834	8.1136
	4	54.7936	126.5826	-45.4762	42.6088	167.2482	223.5836	138.3702	17.794
	5	41.0218	139.9055	-54.8058	4.3097	173.5615	232.6092	175.4208	11.6866	49.3552	-73.7867	-75.4358	-58.7509	-12.1907	39.6748	-73.1772	42.256	85.9009
	6	127.5549	56.1934	118.7239	124.3309	139.6099	64.7365	59.3122	44.5314	124.0349	3.0123	-17.7321	2.7481	122.6103	0.0103	2.9933	0.1045	136.0195
	7	40.2244	140.6769	-54.8587	4.1816	171.3503	232.6603	175.5447	13.8257	49.5957	71.4292	-73.5882	59.8764	-13.5052	-41.9042	-70.4226	-42.9652	84.5827
	8	52.5963	128.7083	-45.7619	39.0934	164.4574	223.8601	141.7711	20.4939
	9	54.9024	126.4774	-51.4091	39.2491	176.8673	229.3232	141.6204	8.4886
	10	52.5469	128.7561	-51.7267	28.3039	181.0635	229.6304	152.2088	4.4292
	11	53.1722	128.1512	-45.9219	33.9449	171.4936	224.0148	146.7517	13.6871
	12	35.3288	145.4129	-60.616	4.0536	162.5487	238.2299	175.6685	22.3403	65.5595	28.8897	-75.1287	32.7657	-18.0427	-62.0996	-69.1741	-77.6015	58.4696
	13	114.1075	69.2024	101.2631	105.9299	135.1296	81.6281	77.1134	48.8656	135.0726	-0.1048	5.9156	0.3629	101.46	-1.1421	-8.4824	-0.7436	105.79
	14	36.2367	144.5346	-59.0027	5.3442	162.3686	236.6692	174.42	22.5146	67.2063	-27.8414	-73.4548	-30.9547	-20.5523	57.004	-70.5152	77.0946	62.0561
	15	3.2804	176.4166	-90.7215	31.2158	69.3468	267.3539	149.3918	112.5039	3.3628	3.3919	-34.5423	6.0084	67.8471	15.1538	-67.4379	12.7372	-61.3688
	16	95.7125	86.9977	61.727	70.7698	154.6408	119.8753	111.1273	29.9905	122.1519	0.812	45.415	2.149	70.7685	2.2566	43.0521	1.8956	94.2171
	17	153.937	30.6713	135.0231	146.2317	180.5562	48.9687	38.1254	4.9199
	18	156.5791	28.1154	140.1987	147.8948	181.6437	43.9617	36.5166	3.8679
	19	158.458	26.2977	139.1547	151.7051	184.5142	44.9717	32.8305	1.0909
	1'	51.7304	129.546	-46.4321	28.6691	172.9543	224.5084	151.8555	12.274
	2'	54.6401	126.7311	-48.7534	32.3075	180.3663	226.7541	148.3357	5.1036
	3'	55.3531	126.0414	-50.1816	40.3832	175.8578	228.1357	140.5233	9.4651
	4'	50.9632	130.2882	-45.8947	36.8964	161.8879	223.9885	143.8964	22.9796
	5'	38.2583	142.5789	-61.5504	4.3512	171.9742	239.1339	175.3806	13.2222	50.2487	75.2857	-70.9408	67.4115	-15.9623	-42.2455	-71.868	-44.3101	80.4886
	6'	127.4504	56.2945	120.133	123.6	138.6183	63.3733	60.0194	45.4906	123.7666	-1.5552	-17.0309	-1.2151	123.0842	0.004	3.4797	0.015	135.5005
	7'	39.2565	141.6133	-56.2506	3.9951	170.025	234.0068	175.7251	15.1078	49.2632	-72.2778	-72.1318	-59.1091	-15.1893	38.177	-72.1851	44.0557	83.6956
	8'	53.2816	128.0454	-46.4743	40.4739	165.8451	224.5492	140.4355	19.1515
	9'	54.5654	126.8035	-51.3431	38.6433	176.3959	229.2593	142.2065	8.9446
	10'	52.676	128.6312	-51.3691	27.0418	182.3553	229.2844	153.4297	3.1795
	11'	54.4925	126.8739	-45.2889	36.8417	171.9248	223.4025	143.9494	13.2699
	12'	35.8467	144.9119	-60.1136	4.4498	163.2037	237.7439	175.2852	21.7067	64.1005	-32.0614	-74.1138	-30.4534	-18.2216	61.0429	-68.4427	79.7455	61.6611
	13'	114.0396	69.2681	101.2078	105.2813	135.6296	81.6815	77.7409	48.3819	135.5858	1.7294	7.3975	-0.6547	101.2704	0.7718	-9.486	0.1291	105.2626
	14'	36.0741	144.6919	-62.6209	6.4571	164.3861	240.1694	173.3434	20.5629	69.0201	32.5266	-72.561	31.1496	-17.4539	-62.3121	-70.6994	-82.0377	56.6561
	15'	4.0101	175.7106	-90.6706	32.4034	70.2975	267.3047	148.243	111.5842	5.3453	-4.438	-33.7893	-8.284	66.3044	-24.1812	-67.6799	-20.6435	-59.6194
	16'	94.6162	88.0583	60.2298	69.095	154.5237	121.3237	112.7475	30.1038	118.6209	-1.2071	46.5578	-2.9504	69.1298	-2.9221	44.7689	-2.6916	96.0978
	17'	153.1179	31.4637	134.2162	144.8682	180.2695	49.7493	39.4445	5.1973
	18'	158.6947	26.0688	139.3527	152.2352	184.4961	44.7802	32.3177	1.1085
	19'	156.3506	28.3364	139.6729	147.8726	181.5063	44.4705	36.5381	4.0008
Hydrogen	1	23.9883	6.7043
	2	23.8675	6.8147
	3	24.0782	6.6222
	4	24.2364	6.4776
	6	25.3725	5.4397
	8	23.9272	6.7601
	9	24.1434	6.5626
	10	23.6349	7.0272
	11	24.2041	6.5071
	17	31.5379	-0.193
	18	29.9493	1.2583
	19	30.0966	1.1237
	20	30.3282	0.9122
	21	28.7607	2.3442
	22	30.8406	0.444
	23	28.9585	2.1635
	24	30.5633	0.6974
	25	31.0947	0.2119
	1'	23.9416	6.747
	2'	23.667	6.9978
	3'	23.9763	6.7153
	4'	23.5718	7.0848
	6'	25.4887	5.3335
	8'	23.8423	6.8377
	9'	24.059	6.6397
	10'	23.6172	7.0433
	11'	24.1785	6.5305
	17'	30.0767	1.1419
	18'	31.2669	0.0545
	19'	29.8369	1.361
	20'	30.5482	0.7112
	21'	31.3724	-0.0419
	22'	29.165	1.9749
	23'	30.2645	0.9704
	24'	28.8402	2.2716
	25'	30.8177	0.4649
P21CA	1	51.5812	129.6904	-44.9373	27.5759	172.1048	223.0623	152.913	13.0958
Carbons	2	52.8301	128.4822	-49.9134	30.0867	178.317	227.8762	150.4841	7.0862
	3	55.4449	125.9526	-49.2383	39.1863	176.3869	227.2232	141.6812	8.9533
	4	51.735	129.5416	-47.8156	39.3184	163.7022	225.8468	141.5534	21.2245
	5	43.1225	137.8733	-50.0492	5.0793	174.3374	228.0076	174.6762	10.936	69.7927	71.4644	77.9329	58.6059	-14.427	36.2614	72.6723	35.4145	74.0018
	6	121.2015	62.3397	102.4913	123.951	137.1621	80.4399	59.6798	46.8994	125.4385	-12.1468	19.5221	-7.7031	110.4665	0.9835	0.5168	7.8673	127.6994
	7	44.579	136.4643	-51.2694	11.4118	173.5945	229.1881	168.5502	11.6547	64.4797	-75.0437	76.0354	-61.4915	-10.021	-30.3838	70.3269	-37.7171	79.2782
	8	52.4271	128.872	-46.3895	33.642	170.0289	224.4672	147.0448	15.1041
	9	56.4909	124.9407	-48.376	41.9265	175.9221	226.389	139.0303	9.4029
	10	53.9381	127.4103	-49.9576	34.1477	177.6242	227.9189	146.5555	7.7564
	11	52.5384	128.7643	-43.7807	31.0092	170.3867	221.9434	149.5917	14.7579
	12	36.3261	144.4481	-60.4736	5.8803	163.5717	238.0922	173.9014	21.3507	83.6762	-36.9502	72.4332	-36.3646	-23.5406	-53.0491	67.4022	-73.7686	48.8428
	13	115.1877	68.1575	102.5837	108.0145	134.9648	80.3505	75.0968	49.0251	134.9501	-2.3266	-5.4242	0.9813	103.7122	2.7681	5.67	1.6135	106.9007
	14	34.5312	146.1845	-64.5178	3.7338	164.3775	242.0045	175.9779	20.5712	81.5643	33.9497	74.5813	33.556	-24.9748	59.1772	72.5222	72.0658	47.004
	15	3.5417	176.1637	-90.5199	30.3864	70.7587	267.1589	150.1942	111.1381	6.9281	3.1575	31.867	5.6425	70.2455	-6.8557	63.5175	-8.958	-66.5484
	16	94.6292	88.0457	59.2681	70.3102	154.3095	122.2541	111.5719	30.311	119.9646	-1.2107	-47.2265	-0.6693	70.3228	1.1525	-44.0455	1.1968	93.6003
	17	157.9172	26.8209	139.1952	149.5352	185.0214	44.9326	34.9297	0.6003
	18	156.4422	28.2478	139.5209	147.7824	182.0233	44.6175	36.6253	3.5007
	19	154.6043	30.0258	136.6449	146.0218	181.1461	47.3997	38.3285	4.3493
	1'	53.681	127.659	-43.0826	25.5757	178.55	221.2681	154.8481	6.8608
	2'	53.1652	128.158	-50.1814	29.4882	180.1888	228.1355	151.0631	5.2754
	3'	55.756	125.6516	-49.9877	41.264	175.9918	227.9481	139.6712	9.3355
	4'	52.4397	128.8598	-48.6991	42.8765	163.1419	226.7015	138.1113	21.7666
	5'	36.3661	144.4095	-58.109	-2.2597	169.4669	235.8046	181.7761	15.6477	48.1497	-78.1903	73.3085	-69.3892	-5.8702	-42.6298	73.6214	-42.2128	66.8187
	6'	126.0966	57.6041	116.4204	126.0558	135.8137	66.9649	57.6436	48.2038	120.5141	1.4714	19.0716	-2.881	126.2113	-1.8646	-3.3301	-0.1787	131.5645
	7'	39.014	141.8478	-53.1285	0.8733	169.2973	230.9865	178.7452	15.8118	63.3747	77.4105	69.3605	68.8266	-7.2364	43.4491	66.9255	42.8923	60.9038
	8'	53.5951	127.7421	-44.5385	41.4132	163.9105	222.6765	139.5269	21.023
	9'	53.3664	127.9633	-52.7343	35.8287	177.0048	230.6051	144.9293	8.3556
	10'	53.8078	127.5364	-51.3109	32.1396	180.5946	229.2282	148.4981	4.8828
	11'	53.8123	127.532	-46.6771	34.8647	173.2492	224.7455	145.8619	11.9887
	12'	36.6423	144.1422	-58.3534	6.0647	162.2156	236.0411	173.723	22.6626	65.8417	47.2202	74.2875	33.9415	2.553	69.3189	55.7802	85.192	41.5322
	13'	113.8559	69.4458	103.3792	105.4499	132.7386	79.5809	77.5778	51.1787	131.6389	-7.4943	-6.6064	-2.9495	106.0938	3.8028	9.7747	-2.7857	103.835
	14'	36.9799	143.8156	-62.086	10.9178	162.1079	239.652	169.0281	22.7668	71.7688	-37.2978	70.3884	-35.0379	-11.2552	-65.5702	60.0513	-84.8235	50.4261
	15'	1.2284	178.4016	-90.9176	31.2991	63.3038	267.5437	149.3113	118.3499	-61.6241	-31.2607	48.8754	-54.4655	30.1936	1.4538	36.368	-3.9021	35.1158
	16'	94.9325	87.7523	60.8418	70.0633	153.8924	120.7316	111.8108	30.7145	113.3771	0.8053	-45.8029	-0.8978	67.1313	-5.8548	-43.5069	-5.8196	104.2891
	17'	160.2627	24.5518	140.6851	155.588	184.5151	43.4913	29.0741	1.0901
	18'	149.6692	34.8	133.8579	137.919	177.2306	50.0959	46.1672	8.1371
	19'	156.2713	28.4131	138.8741	149.0493	180.8905	45.2432	35.3997	4.5966
Hydrogen	1	23.8037	6.8729
	2	24.4033	6.3251
	3	24.0392	6.6578
	4	24.0304	6.6658
	6	25.8284	5.0231
	8	23.0207	7.5883
	9	24.0877	6.6134
	10	24.4078	6.321
	11	23.8026	6.8739
	17	30.9721	0.3239
	18	30.3298	0.9107
	19	28.8095	2.2996
	20	28.64	2.4545
	21	30.3505	0.8918
	22	30.6606	0.6084
	23	29.9273	1.2784
	24	29.9674	1.2418
	25	32.1311	-0.7349
	1'	22.9175	7.6826
	2'	23.8303	6.8486
	3'	24.3869	6.3401
	4'	23.9482	6.7409
	6'	25.4682	5.3523
	8'	23.8447	6.8355
	9'	23.8466	6.8337
	10'	23.7935	6.8823
	11'	23.911	6.7749
	17'	29.1273	2.0093
	18'	31.9085	-0.5316
	19'	30.6779	0.5927
	20'	29.9513	1.2565
	21'	30.3649	0.8787
	22'	30.0724	1.1459
	23'	29.0307	2.0975
	24'	30.0972	1.1232
	25'	30.5804	0.6817
PCC2	1	54.2688	127.0903	-44.1504	35.2283	171.7285	222.3011	145.5101	13.4598
Carbons	2	52.0659	129.2214	-51.4348	27.2481	180.3844	229.348	153.2302	5.0861
	3	53.4454	127.887	-51.3817	34.6831	177.0347	229.2967	146.0375	8.3267
	4	51.6919	129.5833	-46.5056	38.8038	162.7775	224.5795	142.0512	22.119
	5	45.249	135.8161	-47.0685	6.8792	175.9364	225.1241	172.9351	9.3891	71.1636	69.06	-75.3246	57.8029	-12.6954	-35.3054	-76.0126	-35.6927	77.2789
	6	120.4958	63.0223	101.8525	122.528	137.1069	81.0579	61.0564	46.9528	126.1298	-11.1827	-19.8255	-5.2129	108.635	-1.1831	-1.2593	-9.748	126.7227
	7	44.7069	136.3405	-48.9775	10.9878	172.1105	226.9709	168.9604	13.0903	65.5051	-72.7635	-72.5636	-62.2098	-8.1108	31.8816	-72.6486	35.1365	76.7264
	8	52.2917	129.003	-47.4627	34.8672	169.4706	225.5054	145.8595	15.6442
	9	55.5407	125.8599	-50.3791	40.7226	176.2786	228.3267	140.1949	9.0581
	10	52.1979	129.0938	-51.3242	25.5648	182.353	229.241	154.8586	3.1817
	11	53.2054	128.1191	-44.4459	34.208	169.8541	222.5869	146.4972	15.2731
	12	38.9193	141.9395	-58.8402	8.7248	166.8733	236.512	171.1497	18.1567	85.0831	-38.8296	-71.2603	-35.9887	-19.7698	53.3245	-68.2206	77.6879	51.4446
	13	115.5402	67.8164	102.0244	109.8917	134.7044	80.8916	73.2808	49.2769	134.6537	-2.8466	4.4872	0.3511	102.4291	-3.5265	-5.1121	0.2757	109.5377
	14	35.9733	144.7894	-61.6346	3.8165	165.7381	239.2153	175.8979	19.255	80.1694	33.4967	-75.5335	33.2391	-24.0425	-56.6817	-73.013	-72.4302	51.793
	15	2.3567	177.3101	-90.932	29.6164	68.3858	267.5576	150.9391	113.4336	6.6865	4.9004	-31.3039	7.7724	66.6815	15.6778	-62.5433	14.3855	-66.2978
	16	94.3408	88.3247	58.6606	69.507	154.8548	122.8417	112.3489	29.7834	118.2798	0.0356	47.8624	0.7667	69.5007	0.9116	45.5098	0.7105	95.242
	17	158.5358	26.2224	139.9444	150.9688	184.6943	44.2078	33.5428	0.9167
	18	157.0537	27.6562	140.9668	148.6302	181.5642	43.2187	35.8052	3.9448
	19	153.1074	31.4739	134.2877	144.9153	180.1191	49.68	39.3989	5.3428
	1'	52.3616	128.9354	-43.1734	21.5533	178.7049	221.356	158.7393	6.7109
	2'	52.6672	128.6398	-49.2747	31.37	175.9062	227.2584	149.2426	9.4183
	3'	56.7897	124.6517	-48.6873	43.3277	175.7285	226.6901	137.6747	9.5902
	4'	53.0422	128.277	-47.6692	43.5273	163.2685	225.7052	137.4817	21.644
	5'	37.0324	143.7649	-57.2443	-1.7709	170.1123	234.9681	181.3031	15.0233	45.4845	-79.7719	-73.4245	-67.2318	-3.9283	43.3188	-71.6977	45.7066	69.541
	6'	126.6825	57.0373	117.5622	125.3473	137.1381	65.8603	58.329	46.9226	120.8563	0.695	-19.6362	-2.8209	125.5451	2.7774	5.1447	-0.2129	133.6462
	7'	38.0325	142.7973	-55.957	1.4005	168.6541	233.7228	178.2352	16.434	60.2612	76.257	-69.2797	67.4758	-11.5016	-45.1517	-67.9987	-41.9386	65.338
	8'	53.3534	127.976	-46.4678	43.3604	163.1675	224.543	137.6432	21.7417
	9'	55.1639	126.2245	-50.7332	40.5516	175.6732	228.6693	140.3604	9.6437
	10'	55.665	125.7397	-50.0683	40.0278	177.0354	228.026	140.8671	8.326
	11'	52.6094	128.6957	-46.0582	28.7838	175.1025	224.1467	151.7446	10.1958
	12'	36.6046	144.1787	-59.0216	6.6278	162.2075	236.6875	173.1783	22.6705	63.2993	44.3876	-73.4987	34.1523	2.0431	-71.0987	-55.9347	-86.3136	44.4713
	13'	115.2348	68.1118	106.0508	107.5714	132.0823	76.9965	75.5254	51.8136	130.8022	-6.5811	4.4615	-2.5271	108.4289	-3.9686	-10.7403	4.7359	106.4734
	14'	36.8346	143.9562	-61.9095	10.3542	162.0592	239.4813	169.5733	22.814	67.1499	-35.4597	-71.1715	-34.1249	-9.0328	68.6912	-59.8103	85.38	52.3868
	15'	2.4765	177.1942	-89.2393	34.7706	61.8983	265.9201	145.9529	119.7096	-44.3364	-33.5211	-57.923	-55.211	25.2516	-13.7503	-47.8095	-4.7594	26.5144
	16'	94.1771	88.4831	59.7442	69.2085	153.5786	121.7934	112.6377	31.0181	112.7495	-1.7121	45.5675	-2.8759	64.4685	4.2986	43.1815	4.3412	105.3133
	17'	160.8038	24.0284	142.4414	155.9364	184.0337	41.7922	28.7371	1.5558
	18'	149.0273	35.421	132.9526	137.6854	176.4439	50.9716	46.3931	8.8981
	19'	157.5627	27.1638	140.0451	148.7178	183.9254	44.1104	35.7204	1.6606
Hydrogen	1	24.2467	6.4682
	2	23.7932	6.8825
	3	24.035	6.6616
	4	23.8642	6.8177
	6	26.1314	4.7463
	8	22.8526	7.7418
	9	23.9752	6.7163
	10	23.3536	7.2842
	11	23.9696	6.7213
	17	31.1216	0.1873
	18	30.6598	0.6092
	19	28.9114	2.2066
	20	28.5483	2.5382
	21	30.2473	0.986
	22	30.7725	0.5062
	23	29.9758	1.2341
	24	29.9007	1.3028
	25	31.5378	-0.1929
	1'	22.348	8.2029
	2'	24.1934	6.5169
	3'	24.3847	6.3422
	4'	23.9634	6.7271
	6'	25.6253	5.2087
	8'	23.8077	6.8693
	9'	23.9952	6.698
	10'	24.643	6.1062
	11'	23.5163	7.1355
	17'	29.1097	2.0254
	18'	32.0337	-0.646
	19'	30.513	0.7433
	20'	29.9099	1.2943
	21'	30.3612	0.882
	22'	29.9857	1.225
	23'	28.6842	2.4141
	24'	30.4041	0.8428
	25'	30.7515	0.5254
P2121	1	53.0188	128.2996	-45.5704	33.1671	171.4597	223.6748	147.5041	13.7199
Carbons	2	54.4687	126.8969	-50.1857	33.4258	180.1662	228.1397	147.2539	5.2972
	3	55.3897	126.006	-50.6644	40.0134	176.82	228.6027	140.8811	8.5343
	4	52.9365	128.3792	-45.8703	38.0622	166.6177	223.9649	142.7687	18.404
	5	39.4715	141.4052	-57.4016	3.8292	171.987	235.1203	175.8856	13.2098	48.8869	-72.16	-74.7597	-58.4582	-17.0576	38.7114	-72.5651	42.8774	86.5853
	6	127.5747	56.1743	120.6781	123.6528	138.3931	62.846	59.9683	45.7085	123.9045	-1.3485	-16.5904	-0.7989	123.4002	-0.1545	3.5435	0.6654	135.4193
	7	40.48	140.4296	-55.4889	5.2779	171.6511	233.27	174.4841	13.5347	46.1306	73.996	-71.1491	60.5841	-10.9297	-43.77	-67.1879	-48.5537	86.2392
	8	52.9881	128.3293	-47.0042	39.8952	166.0734	225.0619	140.9954	18.9306
	9	54.9188	126.4616	-50.9013	38.7059	176.9518	228.8319	142.146	8.4068
	10	52.5089	128.7929	-51.1725	27.0539	181.6453	229.0943	153.4181	3.8663
	11	52.8438	128.4689	-46.0493	32.489	172.0918	224.1381	148.1602	13.1084
	12	35.7368	145.0182	-60.8041	5.2039	162.8106	238.4119	174.5558	22.087	64.6442	31.5618	-72.0137	33.0137	-16.7236	-62.3243	-68.3605	-81.3435	59.2898
	13	113.8573	69.4445	100.8779	105.1767	135.5171	82.0007	77.842	48.4907	135.3739	1.0745	5.7022	0.8887	100.9597	0.4021	-9.464	0.4484	105.2382
	14	35.2754	145.4646	-61.0824	4.7137	162.1949	238.6812	175.0299	22.6826	65.5565	-26.4573	-74.9617	-28.67	-21.6085	59.2539	-71.5387	76.5127	61.8782
	15	3.3353	176.3635	-90.9304	30.9029	70.0333	267.556	149.6946	111.8398	1.9359	-2.0436	-35.4043	-2.1394	69.9394	-3.0029	-68.2782	-3.4926	-61.8695
	16	95.2238	87.4705	61.1017	70.1035	154.4661	120.4802	111.7719	30.1595	122.7027	1.9905	45.0534	2.4125	70.1908	1.7821	43.2932	1.3888	92.7778
	17	157.0658	27.6445	139.0326	149.3452	182.8196	45.0898	35.1135	2.7303
	18	153.6866	30.9136	134.8584	145.7281	180.4733	49.1279	38.6127	5.0001
	19	158.047	26.6954	140.3124	149.9079	183.9206	43.8517	34.5691	1.6652
	1'	53.2801	128.0468	-45.6925	34.1676	171.3653	223.7929	146.5362	13.8112
	2'	53.4818	127.8517	-50.4458	29.742	181.1493	228.3913	150.8176	4.3462
	3'	55.0348	126.3493	-51.2377	39.4003	176.9418	229.1573	141.4741	8.4165
	4'	52.8664	128.447	-46.3045	38.9662	165.9375	224.385	141.8941	19.062
	5'	39.7892	141.0979	-56.1471	3.4838	172.031	233.9067	176.2197	13.1672	43.3658	75.6958	-71.4647	61.4107	-8.8269	-44.1345	-70.0246	-47.475	84.8288
	6'	127.6771	56.0751	120.7386	123.6108	138.682	62.7874	60.0089	45.429	123.7006	0.4938	-16.7537	0.0059	123.6337	-0.7056	3.4412	-0.3593	135.6971
	7'	39.556	141.3235	-57.617	4.1674	172.1177	235.3287	175.5585	13.0834	51.9128	-70.7093	-74.9994	-57.8329	-19.75	38.2758	-73.2031	41.0953	86.5052
	8'	52.9472	128.3689	-46.6593	39.7312	165.7697	224.7282	141.154	19.2244
	9'	55.317	126.0764	-50.5645	39.6497	176.8657	228.5061	141.2329	8.4901
	10'	53.8115	127.5327	-50.8478	31.6397	180.6427	228.7802	148.9817	4.8362
	11'	52.0667	129.2207	-46.0162	30.4213	171.7949	224.106	150.1605	13.3956
	12'	35.7422	145.013	-61.3428	5.3549	163.2145	238.933	174.4097	21.6962	68.7728	-26.1266	-75.2576	-26.8215	-23.065	56.9159	-73.9955	76.083	61.5188
	13'	113.6846	69.6116	100.8837	105.0133	135.1567	81.9951	78.0001	48.8395	135.0514	-0.7258	6.0047	1.0669	101.0439	-0.9114	-9.5467	-0.6996	104.9584
	14'	35.1895	145.5477	-61.0915	4.1784	162.4815	238.6899	175.5478	22.4054	62.0405	32.7559	-71.7036	33.7246	-15.7907	-64.1503	-67.1719	-81.9986	59.3186
	15'	3.2167	176.4782	-90.7625	30.7897	69.6229	267.3937	149.804	112.2368	1.9116	1.9678	-34.9495	5.1059	68.0528	15.5332	-68.4855	12.2559	-60.3143
	16'	95.1007	87.5896	60.7905	69.9523	154.5595	120.7813	111.9182	30.0692	122.116	1.8869	45.4189	2.6726	70.0329	2.7088	43.5792	2.2394	93.1533
	17'	153.259	31.3273	134.4798	144.6803	180.6167	49.4942	39.6263	4.8614
	18'	156.4378	28.2521	139.6715	147.9391	181.7027	44.4718	36.4737	3.8108
	19'	158.4166	26.3377	139.5719	151.438	184.24	44.5681	33.0889	1.3562
Hydrogen	1	24.0989	6.6033
	2	23.8187	6.8592
	3	24.1391	6.5665
	4	23.9107	6.7752
	6	25.3053	5.5011
	8	24.058	6.6406
	9	24.0914	6.6101
	10	23.6006	7.0585
	11	24.0862	6.6148
	17	30.7983	0.4826
	18	28.7928	2.3149
	19	30.3151	0.9241
	20	29.9299	1.276
	21	29.9662	1.2428
	22	31.4383	-0.102
	23	30.4639	0.7882
	24	28.7362	2.3666
	25	30.9584	0.3364
	1'	24.1332	6.5719
	2'	23.6905	6.9764
	3'	24.1638	6.544
	4'	23.9032	6.782
	6'	25.2852	5.5195
	8'	23.9344	6.7535
	9'	24.1317	6.5732
	10'	23.7203	6.9491
	11'	24.1016	6.6008
	17'	29.995	1.2165
	18'	31.4592	-0.1212
	19'	30.0369	1.1783
	20'	30.2061	1.0237
	21'	30.7048	0.5681
	22'	28.6954	2.4039
	23'	30.5775	0.6844
	24'	29.0065	2.1197
	25'	31.1017	0.2055
PCCN	1	52.5162	128.7859	-60.4433	4.4615	162.9123	238.0629	175.2739	21.9886
Carbons	2	53.7615	127.5811	-50.5328	31.3521	180.4652	228.4754	149.26	5.008
	3	54.4094	126.9543	-51.7993	38.5077	176.5198	229.7007	142.3377	8.8247
	4	52.2941	129.0007	-47.7549	38.7716	165.8657	225.7881	142.0824	19.1315
	5	39.9694	140.9236	-57.1262	4.7789	172.2554	234.8539	174.9668	12.9501	50.5943	73.6121	72.2243	60.1146	-15.5975	41.4285	71.3469	44.5646	84.9113
	6	127.8863	55.8728	120.8433	124.089	138.7266	62.6862	59.5463	45.3859	123.9184	-0.0238	16.7857	-0.4514	124.0755	-0.0223	-3.321	0.0126	135.665
	7	40.3831	140.5234	-55.7428	4.9586	171.9336	233.5156	174.793	13.2614	47.1724	-71.1205	72.7463	-59.4507	-14.1517	-40.2131	71.9799	-43.4958	88.1287
	8	52.0019	129.2834	-47.6815	37.6654	166.0217	225.7171	143.1525	18.9806
	9	55.1318	126.2555	-51.3225	40.1636	176.5543	229.2394	140.7357	8.7914
	10	53.9565	127.3925	-50.089	31.0699	180.8888	228.0461	149.533	4.5982
	11	52.3871	128.9108	-45.7743	31.5189	171.4166	223.8721	149.0986	13.7615
	12	35.5531	145.1959	-60.9075	4.7082	162.8587	238.5119	175.0352	22.0405	64.6445	-29.6848	73.2829	-30.5313	-20.9471	-60.0197	69.9077	-78.6033	62.962
	13	114.0674	69.2412	101.2842	105.0611	135.8569	81.6077	77.9539	48.162	135.778	-0.7374	-6.6604	-0.2966	101.2934	0.196	9.6192	-0.0909	105.1308
	14	35.6435	145.1085	-60.4433	4.4615	162.9123	238.0629	175.2739	21.9886	66.7564	30.3	73.7427	30.3678	-18.1078	59.7148	71.6039	79.0622	58.2819
	15	3.2945	176.4029	-90.6015	30.6207	69.8644	267.2379	149.9676	112.0032	2.06	1.2262	33.9706	2.3743	69.7504	-4.0964	68.859	-3.5922	-61.9268
	16	95.421	87.2798	60.97	70.4506	154.8423	120.6077	111.4361	29.7956	123.278	0.7995	-45.32	1.1166	70.4672	-0.7874	-43.3519	-0.6004	92.5177
	17	157.8443	26.8915	139.4134	149.8037	184.3157	44.7214	34.6699	1.283
	18	157.2397	27.4763	139.7889	149.0737	182.8566	44.3583	35.3761	2.6946
	19	153.9748	30.6347	135.2307	145.5439	181.1498	48.7678	38.7908	4.3456
	1'	51.8599	129.4207	-47.4948	31.6881	171.3864	225.5365	148.935	13.7908
	2'	53.2134	128.1114	-50.8146	29.8695	180.5853	228.7481	150.6942	4.8917
	3'	54.9006	126.4791	-50.9693	39.0288	176.6423	228.8977	141.8335	8.7062
	4'	53.0714	128.2487	-46.662	39.86	166.0162	224.7308	141.0294	18.9859
	5'	39.3682	141.5052	-56.7711	2.8106	172.065	234.5104	176.8711	13.1343	48.8329	72.6203	74.2453	59.1039	-15.6395	41.7362	71.3468	44.5648	84.9111
	6'	127.8204	55.9365	120.9061	123.9258	138.6293	62.6254	59.7042	45.48	123.8682	-0.2013	16.5448	0.0442	123.9279	-0.3267	-3.321	0.0127	135.6651
	7'	39.3205	141.5514	-58.4003	3.5493	172.8124	236.0865	176.1564	12.4113	44.2605	-74.4548	75.5585	-59.3138	-14.4278	-40.4413	71.9797	-43.4959	88.1287
	8'	53.3089	128.019	-46.0623	38.956	167.0329	224.1507	141.9039	18.0024
	9'	55.1961	126.1933	-51.38	40.4835	176.4847	229.295	140.4263	8.8587
	10'	53.5917	127.7454	-50.4403	30.1086	181.1067	228.3859	150.463	4.3874
	11'	52.3621	128.9349	-46.9204	32.5563	171.4502	224.9808	148.095	13.729
	12'	35.1388	145.5967	-61.6622	4.589	162.4897	239.242	175.1506	22.3975	64.6687	-29.0407	73.0681	-31.0249	-22.2142	-59.6822	69.9077	-78.6035	62.962
	13'	113.8874	69.4154	101.2616	104.9658	135.4348	81.6295	78.0461	48.5704	135.2526	-0.8877	-5.0652	-0.3586	101.2786	0.2958	9.619	-0.0909	105.1309
	14'	35.1444	145.5913	-61.4705	4.2334	162.6703	239.0566	175.4946	22.2228	66.5755	28.938	74.196	30.8762	-19.424	59.7483	71.6038	79.0621	58.2817
	15'	3.299	176.3985	-91.2844	31.2252	69.9564	267.8985	149.3828	111.9142	1.971	1.4644	35.5473	2.2231	69.8526	-3.6821	68.8589	-3.5922	-61.9265
	16'	95.7024	87.0075	61.4453	70.6513	155.0106	120.1478	111.2419	29.6328	123.9216	0.8518	-44.768	1.0401	70.6678	-0.825	-43.352	-0.6004	92.5178
	17'	157.7563	26.9766	139.2433	149.9703	184.0553	44.886	34.5088	1.5349
	18'	157.0718	27.6388	139.6287	148.8565	182.7301	44.5132	35.5862	2.8169
	19'	154.0324	30.579	135.106	146.0041	180.9872	48.8884	38.3457	4.503
Hydrogen	1	24.0365	6.6603
	2	23.5798	7.0775
	3	24.0979	6.6041
	4	23.7915	6.8841
	6	25.3726	5.4396
	8	23.7964	6.8796
	9	24.1394	6.5663
	10	23.6001	7.059
	11	24.0479	6.6498
	17	30.8967	0.3927
	18	30.4635	0.7885
	19	28.8171	2.2927
	20	28.6425	2.4522
	21	30.3064	0.9321
	22	30.8253	0.458
	23	29.9723	1.2373
	24	30.009	1.2037
	25	31.3848	-0.0532
	1'	24.0359	6.6608
	2'	23.6278	7.0336
	3'	24.0952	6.6067
	4'	23.9949	6.6983
	6'	25.3333	5.4755
	8'	24.0302	6.666
	9'	24.1144	6.5891
	10'	23.607	7.0526
	11'	24.0169	6.6782
	17'	30.8671	0.4198
	18'	30.4448	0.8057
	19'	28.8325	2.2786
	20'	28.6681	2.4288
	21'	30.2845	0.9521
	22'	30.7891	0.491
	23'	29.9767	1.2333
	24'	30.0172	1.1963
	25'	31.4006	-0.0676
